# Supplementary material
Source: Springer Nature journal article supplement (https://www.springermedizin.de/resource/supplementary/12998_2011_58_MOESM18_ESM.pdf/9680054)

**B****C2 DH**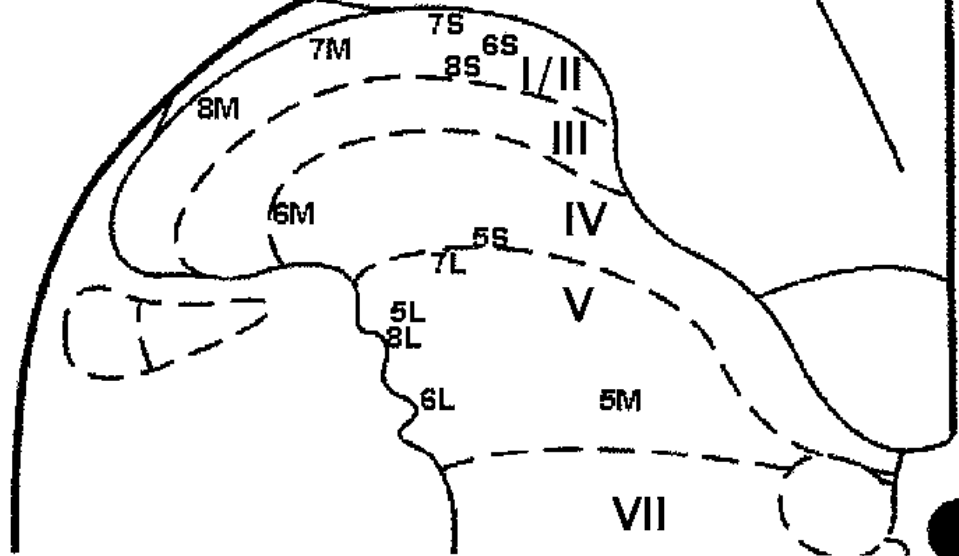

Supplement: MOESM18 [file 9680054]
